# Supplementary material
Source: PubMed Central journal article supplement (PMC11105548)

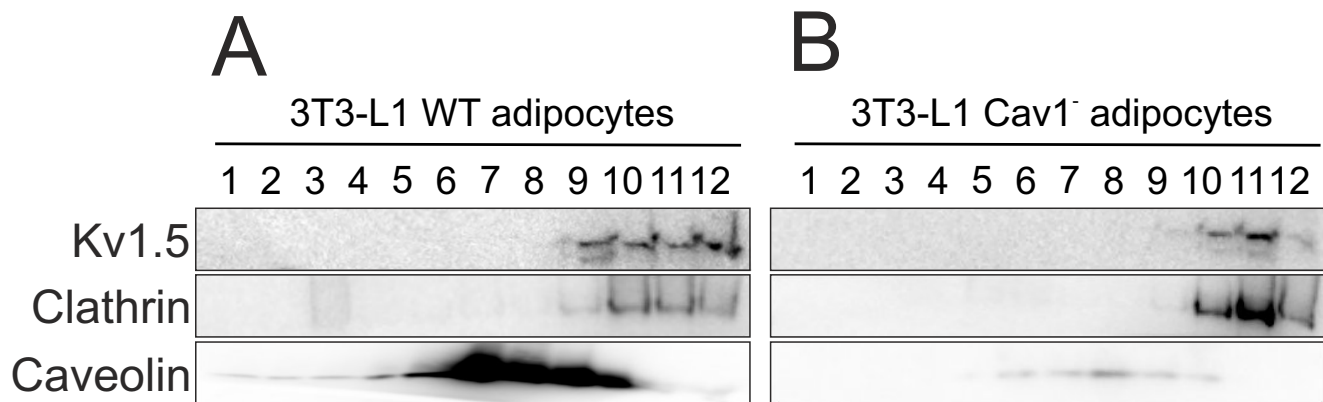

Supplement: 18_2018_2851_MOESM1_ESM.pdf [file 18_2018_2851_MOESM1_ESM.pdf]
